# Supplementary material
Source: PubMed Central journal article supplement (PMC3685395)
Supplement: Supp_Figure1.pdf [file Supp_Figure1.pdf]

## Supplementary data

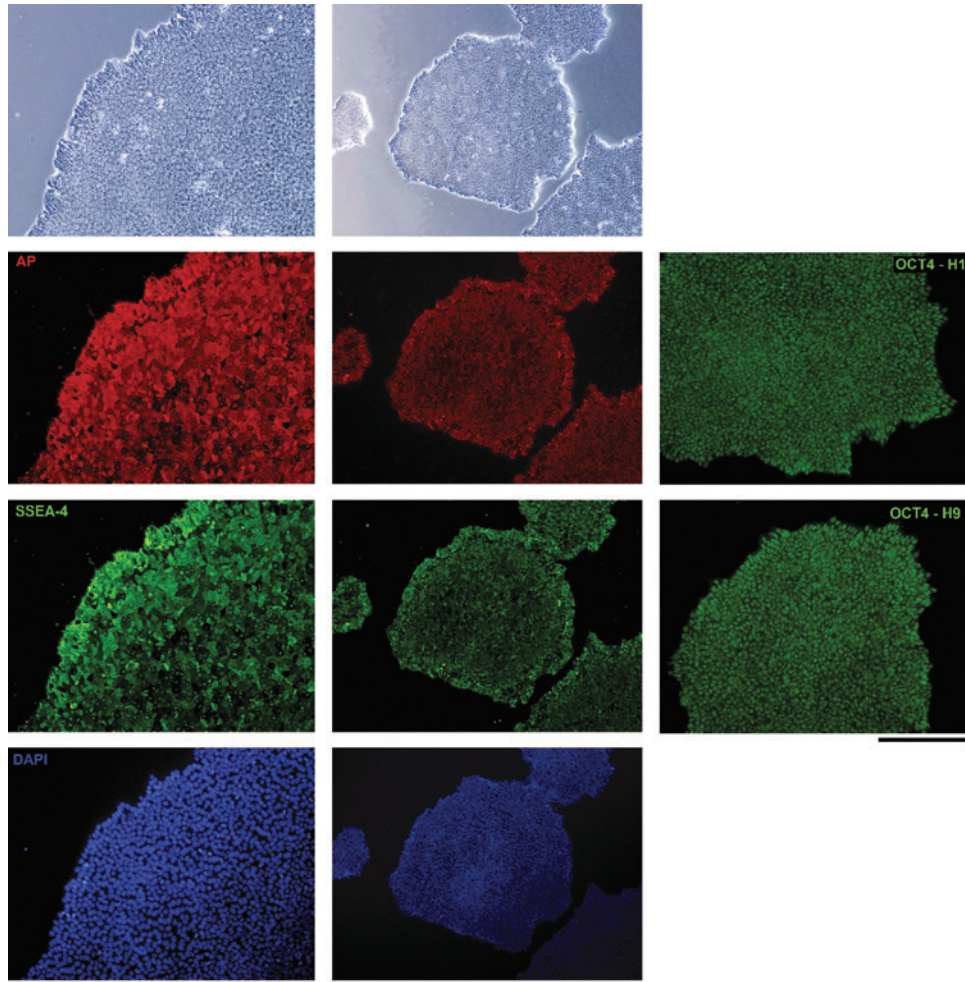

**SUPPLEMENTARY FIG. S1.** Characterization of hESC lines. Expression of hESC-specific markers analyzed by immunofluorescence microscopy. *SSEA-4* and alkaline phosphatase (AP) expression of H1 hESC line on *left* (10 $\times$ ) and *middle column* (4 $\times$ ), and *OCT4* expression of both H1 and H9 hESC lines in *right column*. Nuclei were counterstained with 4',6-diamidino-2-phenylindol (DAPI). All scale bars represent 500  $\mu$ m. hESC, human embryonic stem cell.
