# Supplementary material
Source: PubMed Central journal article supplement (PMC3685395)
Supplement: Supp_Figure2.pdf [file Supp_Figure2.pdf]

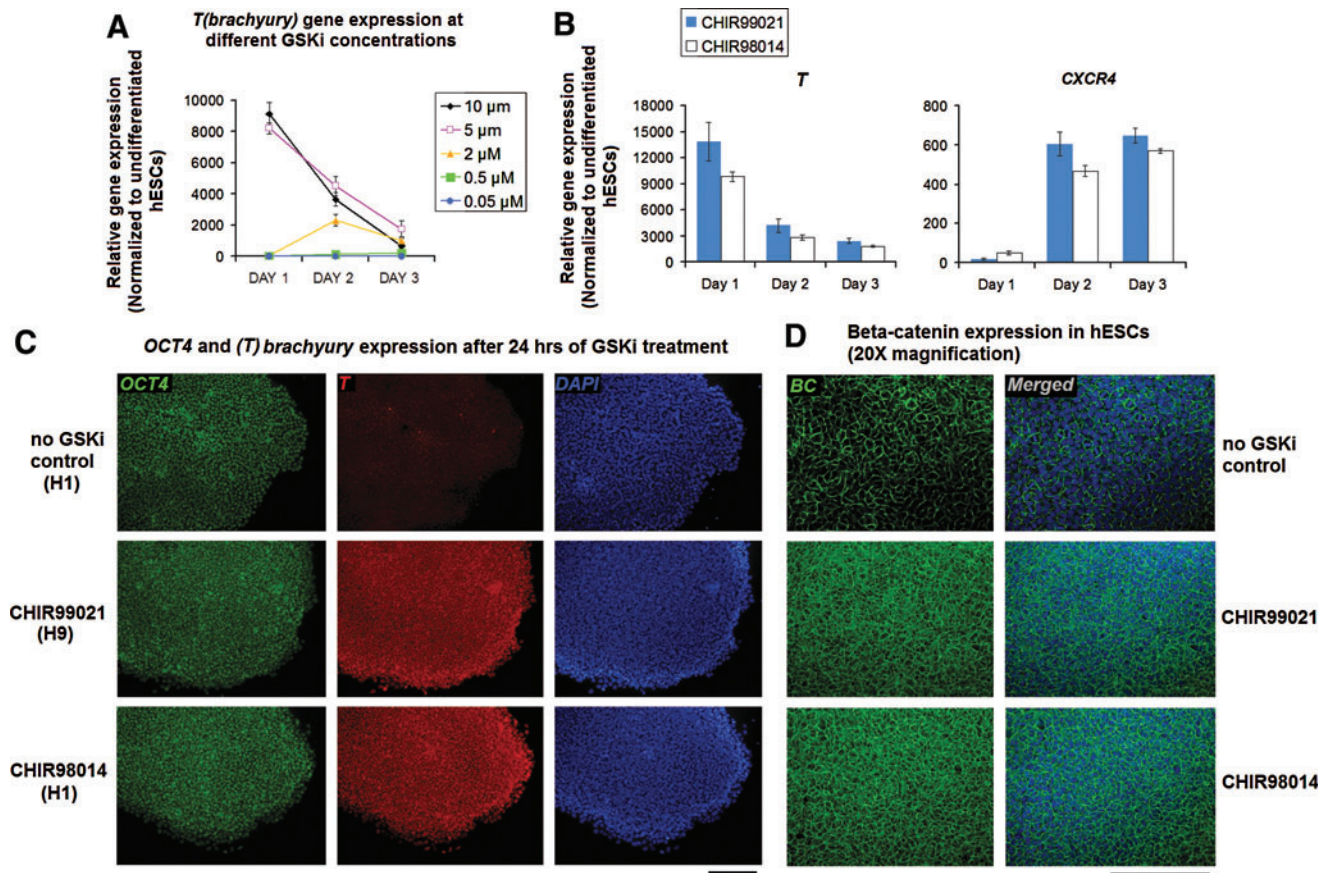

**SUPPLEMENTARY FIG. S2.** *T* (*Brachyury*) and  $\beta$ -*catenin* expression in hESCs after GSKi treatment. **(A)** H1-hESCs were differentiated in different concentrations of GSKi (CHIR99021) to assess its effect on the PS/early mesoderm marker, *T*. qRT-PCR analysis revealed up-regulation at day 1 using concentrations of 5  $\mu$ M and higher. While *T* begins to up-regulate only at day 2 at 2  $\mu$ M, lower concentrations resulted in little or no up-regulation. **(B)** Comparison of transcription profiles for *T* and *CXCR4* in hESCs treated using CHIR99021 at 5  $\mu$ M and a different GSKi, CHIR98014 at 2  $\mu$ M. Although gene expression levels were different, the transcription profiles for both genes were approximately similar for both GSKis with *T* up-regulating and peaking at day 1, while *CXCR4* begins up-regulating at day 2. **(C)** Immunofluorescence analysis of *OCT4* and *brachyury* in hESCs after 24 h of GSKi treatment. *Top row*: H1-hESCs treated with basal media alone without any GSKi, *middle row*: H9 hESCs treated with CHIR99021, *bottom row*: H1-hESCs treated with 2  $\mu$ M CHIR98014. **(D)** 20 $\times$  magnification of  $\beta$ -*catenin* expression in H1-hESCs after 24 h of GSKi treatment. *Top row*: hESCs treated with basal media alone without any GSKi, *middle row*: hESCs treated with CHIR99021, *bottom row*: hESCs treated with CHIR98014. All scale bars represent 200  $\mu$ m. GSK, glycogen synthase kinase; GSKi, GSK inhibitor; PS, primitive streak; qRT-PCR, quantitative real-time PCR.
