# Supplementary material
Source: PubMed Central journal article supplement (PMC3685395)
Supplement: Supp_Figure3.pdf [file Supp_Figure3.pdf]

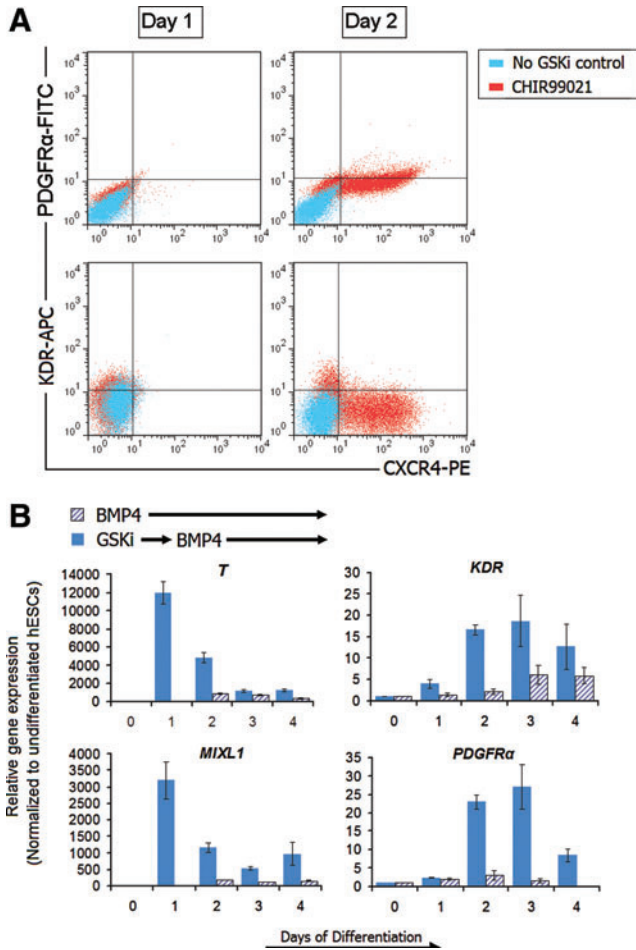

**SUPPLEMENTARY FIG. S3.** Analysis of various markers during the course of GSKi-mediated differentiation. **(A)** FACS analysis of *CXCR4*, *KDR*, and *PDGFRα* expression in hESCs subjected to GSKi treatment. Data presented are dot plots from continuous GSKi treatment group (*red*) overlaid with no-GSKi control groups (*blue*) on their respective day of differentiation. **(B)** Analysis on the transcript levels of *T*, *MIXL1*, *KDR*, and *PDGFRα* in hESCs differentiated in BMP4 with or without prior GSKi treatment as determined by qRT-PCR. All markers were up-regulated in both groups, but the up-regulation was more pronounced in the group initially treated with GSKi. *T* and *MIXL1* up-regulated only at day 2 in the presence of BMP4 without prior GSKi treatment. FACS, fluorescence-activated cell sorting; BMP, bone morphogenetic protein.
