# Supplementary material
Source: PubMed Central journal article supplement (PMC3685395)
Supplement: Supp_Table1.pdf [file Supp_Table1.pdf]

SUPPLEMENTARY TABLE S1. SEQUENCES OF PRIMERS USED FOR REAL-TIME REVERSE TRANSCRIPTASE POLYMERASE CHAIN REACTION

| <i>Gene [GenBank ID]</i>                     | <i>Primer sequence</i>                                                   |
|----------------------------------------------|--------------------------------------------------------------------------|
| <i>BACTIN</i> [NM_001101.3]                  | F: 5'-CCAAGGCCAACCGCGAGAAGATGAC-3'<br>R: 5'-AGGGTACATGGTGGTGCCGCCAGAC-3' |
| <i>CALPONIN</i> [NM_001299.4]                | F: 5'-GTCCACCCCTCCTGGCTTT-3'<br>R: 5'-AAACTGTGTGGTGCCCATCT-3'            |
| <i>CD31</i> [NM_000442.4]                    | F: 5'-TCTATGACCTCGCCCTCCACAAA-3'<br>R: 5'-GAACGGTGTCTTCAGGTTGGTATTTC-3'  |
| <i>CD34</i> [NM_001773.2]                    | F: 5-AAATCCTCTTCCTCTGAGGCTGGA-3'<br>R: 5-AAGAGGCAGCTGGTGATAAGGGTT-3'     |
| <i>CXCR4</i> [NM_003467.2]                   | F: 5'-CGCCTGTTGGCTGCCTTA-3'<br>R: 5'-ACCCTTGCTTGATGATTTC-3'              |
| <i>FOXA2</i> [NM_021784]                     | F: 5'-CCATTGCTGTTGTTGCAGGGAAGT-3'<br>R: 5'-CACCGTGTCAAGATTGGGAATGCT-3'   |
| <i>GSC</i> [NM_173849.2]                     | F: 5'-GATGCTGCCCTACATGAACGT-3'<br>R: 5'-GACAGTGCAGCTGGTTGAGAAG-3'        |
| <i>KDR</i> [NM_002253.2]                     | F: 5-CGGCTCTTTCGCTTACTGTT-3'<br>R: 5-TCCTGTATGGAGGAGGAGGA-3'             |
| <i>MIXL1</i> [NM_031944.1]                   | F: 5'-AAGCCCAGCTGCCTGTT-3'<br>R: 5'-CCCTCCAACCCCGTTTG-3'                 |
| <i>NANOG</i> [NM_024865.2]                   | F: 5'-TGATTTGTGGGCTGAAGAAA-3'<br>R: 5'-GAGGCATCTCAGCAGAAGACA-3'          |
| <i>OCT4</i> [NM_002701.4]                    | F: 5'-CGTGAAGCTGGAGAAGGAGAAGCTG-3'<br>R: 5'-AAGGGCCGCAGCTTACACATGTT-3'   |
| <i>PAX6</i> [NM_001604]                      | F: 5'-CTGGCTAGCGAAAAGCAACAG-3'<br>R: 5'-CCCGTTCAACATCCTTAGTTTATCA-3'     |
| <i>PDGFR<math>\beta</math></i> [NM_002609]   | F: 5'-TGGCAGAAGAAGCCACGTT-3'<br>R: 5'-GGCCGTCAGAGCTCACAGA-3'             |
| <i>PDGFR<math>\alpha</math></i> [NM_006206]  | F: 5'-GATTAAGCCGGTCCCAACCT-3'<br>R: 5'-GGATCTGGCCGTGGGTTT-3'             |
| <i>SM22<math>\alpha</math></i> [NM_003186.3] | F: 5'-GGCAGCTTGGCAGTGACC-3'<br>R: 5'-TGGCTCTCTGTGAATCCCTCT-3'            |
| <i>SOX1</i> [NM_005986]                      | F: 5'-GCGGTAACAATAAAAAACTTGTA-3'<br>R: 5'-GCGGAGCTCGTCGCATT-3'           |
| <i>SOX17</i> [NM_022454.3]                   | F: 5'-AGAGATTGTTTCCCATAGTTGGATT-3'<br>R: 5'-TGTTTTGGGACACATTCAAAGCT-3'   |
| <i>SOX2</i> [NM_003106.2]                    | F: 5'-CCGCATGTACAACATGATGG-3'<br>R: 5'-CTTCTTCATGAGCGTCTTGG-3'           |
| <i>T</i> [NM_003181.2]                       | F: 5'-GGGTGGCTTCTTCTGGAAC-3'<br>R: 5'-TTGGAGAATTGTTCCGATGAG-3'           |
| <i>VE-CAD</i> [NM_001795.3]                  | F: 5'-AGCCCAAAGTGTGTGAGAACGC-3'<br>R: 5'-CTGAGATGACCACGGGTAGGAA-3'       |
| <i>VWF</i> [NM_000552.3]                     | F: 5'-TTCCAGAATGGCAAGAGAGTG-3'<br>R: 5'-TGAGTTGGCAAAGTCATAAGG-3'         |
| <i><math>\alpha</math>SMA</i> [NM_001613.2]  | F: 5'-CACTGTCAGGAATCCTGTGA-3'<br>R: 5'-CAAAGCCGGCCTTACAGA-3'             |
