# Supplementary material
Source: PubMed Central journal article supplement (PMC3685395)
Supplement: Supp_Table2.pdf [file Supp_Table2.pdf]

SUPPLEMENTARY TABLE S2. ANTIBODIES USED FOR IMMUNOFLUORESCENCE AND FLOW CYTOMETRY

| <i>Protein</i>       | <i>Antibody</i>                                                                          | <i>Supplier</i>               |
|----------------------|------------------------------------------------------------------------------------------|-------------------------------|
| Alkaline phosphatase | Anti-Human Alkaline Phosphatase (clone H-300) Rabbit IgG (sc-30203)                      | Santa Cruz                    |
| Beta-catenin         | Anti-Human Beta-Catenin Polyclonal Rabbit IgG (AB16051)                                  | Abcam                         |
| Brachyury            | Anti-Human Brachyury Polyclonal Rabbit IgG (AB20680)                                     | Abcam                         |
| Calponin             | Anti-Human Calponin Monoclonal Mouse IgG1 (ab700)                                        | Abcam                         |
| CD31                 | Anti-Human CD31/PECAM-1 Monoclonal (Clone 9G11), Mouse IgG1 (BBA7)                       | R&D Systems                   |
| CD31                 | Anti-Human CD31-FITC Monoclonal (clone AC128) Mouse IgG1 (130-092-654)                   | Miltenyi Biotec               |
| CD34                 | Anti-Human CD34-APC (clone AC136) Mouse IgG2a (130-090-954)                              | Miltenyi Biotec               |
| CD34                 | Anti-Human CD34-FITC Monoclonal (clone AC136) Mouse IgG2a (130-081-001)                  | Miltenyi Biotec               |
| CXCR4                | Anti-Human CD184-PE (clone 12G5) Mouse IgG2a (561733)                                    | BD Biosciences                |
| KDR                  | Anti-Human CD309-APC (VEGFR02/KDR) Monoclonal (clone ES8-20E6) Mouse IgG1 (130-093-601)  | Miltenyi Biotec               |
| KDR                  | Anti-Human VEGF R2/KDR-PE Monoclonal (Clone 89106), Mouse IgG1 (FAB357P)                 | R&D Systems                   |
| OCT4                 | Anti-Human OCT4 Monoclonal (Clone C-10) Mouse IgG (sc-5279)                              | Santa Cruz Biotechnology      |
| PDGFR $\alpha$       | Anti-Human PDGFR alpha Fluorescein Monoclonal (Clone PRa292), Mouse IgG1 (FAB1264F)      | R&D Systems                   |
| SOX17                | Anti-Human Sox17-Alexa Fluor <sup>®</sup> 488 (clone P7-969) Mouse IgG1 (562205)         | BD Biosciences                |
| SSEA-4               | Anti-Human Stage-Specific Embryonic Antigen-4 (clone MC-81-70) Monoclonal IgG3 (MAB4304) | Merck Millipore               |
| VE-cadherin          | Anti-Human VE-Cadherin Allophycocyanin Monoclonal (Clone 123413), Mouse IgG2B (FAB9381A) | R&D Systems                   |
| VE-cadherin          | Anti-Human VE-Cadherin Monoclonal (Clone 123413), Mouse IgG2B (MAB9381)                  | R&D Systems                   |
| vWF                  | Anti-Human Von Willebrand Factor Polyclonal Rabbit IgG (ab9378)                          | Abcam                         |
| $\alpha$ -SMA        | Anti-Human alpha-Smooth Muscle Actin Monoclonal (Clone 1A4), Mouse IgG2A (MAB1420)       | R&D Systems                   |
| Secondary antibody   | Alexa Fluor 488 Goat anti-rabbit IgG (H+L) (A-11008)                                     | Invitrogen (Molecular Probes) |
| Secondary antibody   | Alexa Fluor 488 Goat anti-mouse IgG (H+L) (A-11001)                                      | Invitrogen (Molecular Probes) |
| Secondary antibody   | Alexa Fluor 594 Goat anti-rabbit IgG (H+L) (A-11037)                                     | Invitrogen (Molecular Probes) |
| Secondary antibody   | Alexa Fluor 594 Goat anti-mouse IgG (H+L) (A-11005)                                      | Invitrogen (Molecular Probes) |
| Isotype control      | Fluorescein Isotype Control (Clone 11711), Mouse IgG1 (IC002F)                           | R&D Systems                   |
| Isotype control      | Phycoerythrin Isotype Control (Clone 11711), Mouse IgG1 (IC002A)                         | R&D Systems                   |

The supplier and catalog number is provided for each antibody.
